# Supplementary material for: Intraskeletal variability in phosphate oxygen isotope composition reveals regional heterothermies in marine vertebrates
Source: Copernicus journal article supplement (doi:10.5194/bg-2022-10), 2022-01-19
Supplement: Supplementary file 1 [file Supplementary-tables.xlsx]

## Sheet: Supp. Table 1
	Table S1. Informations about studied specimens
	Collection number	Taxon	Thermoregulatory strategy	Distribution area	Sex	Size (m)	Weight (kg)	Death date	Death location
	M.1162	Delphinus delphis delphis Linnaeus, 1758	Whole-body endothermy	North Atlantic	F	2.08	-	1980-08-02	Saint Denis d'Oléron, France
	MNHN-ZC-AC-1876-275	Delphinus delphis delphis Linnaeus, 1758	Whole-body endothermy	Western Mediterranean Sea	-	~ 1.65	-	1876	El Kalla, Algeria
	MNHN-ZC-AC-1983-058	Cephalorhynchus commersonii kerguelensis Robineau, Goodall, Pichler & Baker, 2007	Whole-body endothermy	South of the Indian Ocean	M	~ 1.64	70	1983-11-01	Kerguelen Islands
	-	Thunnus thynnus Linnaeus, 1758	Cranial and red-muscle endothermy	Western Mediterranean Sea	-	1.4	26	02/18/2020	Off the Spanish coasts
	-	Xiphias gladius Linnaeus, 1758	Cranial endothermy	Western Mediterranean Sea	-	1.6	29.5	02/19/2020	Off the French coasts

## Sheet: Supp. Table 2
Table S2. Oxygen isotope compositions of dolphins phosphate are reported along with their corresponding sample location.
Collection Number	Taxon	# Sample	Skeletal element	Sample location	Body region	δ18Op (‰, V-SMOW)
						Mean	SD	N
MNHN-ZM-AC-1876-275	Delphinus delphis delphis	MDD1	Epistropheus	centrum, cranial face	Axial	19.0	0.2	5
		MDD2	Epistropheus	neural spine	Axial	19.2	0.2	5
				Δ centrum - neural spine		-0.2
		MDD3	1st thoracic vertebra	centrum, caudal face	Axial	18.7	0.1	5
		MDD4	1st thoracic vertebra	neural spine, left side	Axial	19.4	0.1	5
				Δ centrum - neural spine		0.7
		MDD5	7th thoracic vertebra	centrum, caudal face	Axial	18.5	0.1	5
		MDD6	7th thoracic vertebra	neural spine, left side	Axial	19.1	0.1	5
				Δ centrum - neural spine		0.6
		MDD7	14th thoracic vertebra	centrum, caudal face	Axial	18.4	0.2	5
		MDD8	14th thoracic vertebra	neural spine, left side	Axial	18.9	0.2	5
				Δ centrum - neural spine		0.5
		MDD9	1st lumbar vertebra	centrum, cranial face	Axial	18.5	0.2	5
		MDD10	1st lumbar vertebra	neural spine, left side	Axial	18.7	0.1	4
				Δ centrum - neural spine		0.2
		MDD11	11th lumbar vertebra	centrum, caudal face	Axial	18.3	0.1	5
		MDD12	11th lumbar vertebra	neural spine, left side	Axial	19.1	0.2	5
				Δ centrum - neural spine		0.8
		MDD13	20th lumbar vertebra	centrum, cranial face	Axial	18.4	0.1	5
		MDD14	20th lumbar vertebra	neural spine, left side	Axial	18.7	0.2	4
				Δ centrum - neural spine		0.3
		MDD15	1st caudal vertebra	neural spine	Axial	19.1	0.2	5
		MDD16	8th caudal vertebra	neural spine	Axial	18.9	0.2	5
		MDD17	14th caudal vertebra	centrum and neural spine	Axial	19.0	0.1	5
		MDD18	1st left rib	caudal face, distal	Axial	19.1	0.1	5
		MDD19	1st right rib	caudal face, distal	Axial	18.7	0.1	5
		MDD20	7th left rib	proximal	Axial	18.7	0.2	5
		MDD21	7th right rib	proximal	Axial	18.3	0.2	5
		MDD22	7th left rib	distal	Axial	18.9	0.2	5
		MDD23	7th right rib	distal	Axial	18.9	0.2	4
		MDD26	Left scapula	anterior side	Axial	19.1	0.1	5
		MDD27	Right scapula	anterior side	Axial	19.0	0.2	5
		MDD28	Left humerus	Posterior part	Appendicular skeleton	18.9	0.1	4
		MDD30	Left radius	Anterior part	Appendicular skeleton	19.8	0.1	5
		MDD31	Right radius	Anterior part	Appendicular skeleton	19.8	0.1	5
		MDD32	Left ulna	posterior part	Appendicular skeleton	19.8	0.1	5
		MDD33	Right ulna	posterior part	Appendicular skeleton	19.0	0.1	5
		MDD34	Phalanx	medial face	Appendicular skeleton	19.4	0.2	4
		MDD35	Phalanx	medial face	Appendicular skeleton	18.8	0.1	5
		MDD36	Tooth	Left maxillar	Tooth	19.0	0.1	5
				Min. δ18Op		18.3
				Max. δ18Op		19.8
				Mean δ18Op		18.9	SD	0.4
				Δδ18Op		1.5
				Mid-range		19.0
Collection Number	Taxon	# Sample	Skeletal element	Sample location	Body region	δ18Op (‰, V-SMOW)
						Mean	SD	N
M.1162	Delphinus delphis delphis	DD1	Epistropheus	centrum, caudal face	Axial	18.1	0.3	3
		DD2	Epistropheus	neural spine	Axial	18.2	0.5	4
				Δ centrum - neural spine		0.1
		DD3	1st thoracic vertebra	centrum, caudal face	Axial	18.1	0.1	4
		DD4	1st thoracic vertebra	neural spine, left side	Axial	18.3	0.1	4
				Δ centrum - neural spine		0.2
		DD5	7th thoracic vertebra	centrum, caudal face	Axial	18.3	0.5	4
		DD6	7th thoracic vertebra	neural spine, left side	Axial	18.7	0.5	4
				Δ centrum - neural spine		0.4
		DD7	14th thoracic vertebra	centrum, caudal face	Axial	18.2	0.2	4
		DD8	14th thoracic vertebra	neural spine, left side	Axial	17.4	0.3	5
				Δ centrum - neural spine		0.8
		DD9	1st lumbar vertebra	centrum, caudal face	Axial	17.7	0.1	4
		DD10	1st lumbar vertebra	neural spine, left side	Axial	18.1	0.2	5
				Δ centrum - neural spine		0.4
		DD11	11th lumbar vertebra	centrum, caudal face	Axial	18.1	0.2	4
		DD12	11th lumbar vertebra	neural spine, left side	Axial	17.9	0.2	4
				Δ centrum - neural spine		0.2
		DD13	21st lumbar vertebra	centrum, caudal face	Axial	18.0	0.1	5
		DD14	21st lumbar vertebra	neural spine, left side	Axial	18.0	0.1	5
				Δ centrum - neural spine		0.0
		DD15	1st caudal vertebra	centrum, cranial face	Axial	17.7	0.1	5
		DD16	1st caudal vertebra	neural spine, left side	Axial	17.8	0.1	5
				Δ centrum - neural spine		0.1
		DD17	8th caudal vertebra	centrum, caudal face	Axial	18.2	0.1	5
		DD18	8th caudal vertebra	neural spine, left side	Axial	18.0	0.1	4
				Δ centrum - neural spine		-0.2
		DD19	15th caudal vertebra	centrum, cranial face	Axial	18.2	0.1	4
		DD20	15th caudal vertebra	neural spine, left side	Axial	18.7	0.3	4
				Δ centrum - neural spine		0.5
		DD21	29th caudal vertebra	centrum, caudal face	Axial	19.0	0.2	4
		DD22	Left scapula	anterior side	Axial	18.4	0.3	4
		DD23	Right scapula	anterior side	Axial	18.2	0.1	4
		DD24	Left humerus	medio-anterior side	Appendicular skeleton	19.2	0.2	4
		DD25	Left radius	ventro-anterior side	Appendicular skeleton	18.6	0.2	5
		DD26	Left ulna	ventro-posterior side	Appendicular skeleton	18.5	0.3	5
		DD27	Left? Scaphoid		Appendicular skeleton	18.6	0.2	4
		DD28	Phalanx	II.3	Appendicular skeleton	18.2	0.2	4
		DD29	Phalanx	III.2	Appendicular skeleton	18.7	0.3	4
		DD30	Left? Ulnare	medial face	Appendicular skeleton	18.7	0.3	4
		DD31	Left mandible		Skull	18.0	0.4	5
		DD32	1st left rib	proximal	Axial	17.7	0.1	5
		DD33	1st left rib	distal	Axial	18.1	0.2	4
				Δintra-rib		-0.4
		DD34	1st right rib	proximal	Axial	18.3	0.1	4
		DD35	1st right rib	distal	Axial	18.0	0.1	5
				Δintra-rib		0.3
		DD36	7th left rib	proximal	Axial	18.1	0.2	5
		DD37	7th left rib	distal	Axial	18.3	0.1	5
				Δintra-rib		-0.2
		DD38	7th right rib	proximal	Axial	18.1	0.2	5
		DD39	7th right rib	distal	Axial	18.3	0.2	4
				Δintra-rib		0.2
		DD40	14th left rib	proximal	Axial	18.1	0.2	5
		DD41	14th left rib	distal	Axial	18.9	0.1	5
				Δintra-rib		-0.8
		DD42	14th right rib	proximal	Axial	17.9	0.1	4
		DD43	14th right rib	distal	Axial	18.4	0.2	5
				Δintra-rib		-0.5
		DD44	Symphysal teeth	Bulk	Tooth	18.8	0.1	4
		DD45	Intermedial teeth	Bulk	Tooth	18.4	0.1	3
		DD46	Posterior teeth	Bulk	Tooth	18.8	0.2	5
				Min. δ18Op		17.4
				Max. δ18Op		19.2
				Mean δ18Op		18.3	SD	0.4
				Δδ18Op		1.8
				Mid-range		18.3
MNHN-ZC-AC-1983-058	Cephalorhynchus commersonii kerguelensis	CC1	Left mandible	medial face	Skull	18.0	0.2	4
		CC2	Epistropheus	centrum, cranial face	Axial	17.5	0.2	4
		CC3	Epistropheus	neural spine, left side	Axial	17.6	0.2	3
				Δ centrum - neural spine		0.1
		CC4	1st thoracic vertebra	centrum, left side	Axial	17.8	0.2	4
		CC5	1st thoracic vertebra	neural spine, left side	Axial	17.8	0.1	3
				Δ centrum - neural spine		0.0
		CC6	7th thoracic vertebra	centrum, right side	Axial	17.7	0.1	5
		CC7	7th thoracic vertebra	neural spine, right side	Axial	17.5	0.2	5
				Δ centrum - neural spine		-0.2
		CC8	13th thoracic vertebra	centrum, right side	Axial	17.8	0.2	5
		CC9	1st lumbar vertebra	centrum, right side	Axial	18.1	0.1	4
		CC10	8th lumbar vertebra	centrum, right side	Axial	17.8	0.2	5
		CC11	16th lumbar vertebra	centrum, right side	Axial	17.8	0.1	5
		CC12	1st caudal vertebra	centrum, right side	Axial	17.7	0.1	5
		CC13	8th caudal vertebra	centrum, right side	Axial	18.1	0.2	4
		CC14	16th caudal vertebra	centrum, right side	Axial	18.5	0.2	5
		CC15	Left scapula	medio-anterior side	Axial	18.2	0.2	5
		CC16	Right scapula	medio-anterior side	Axial	17.7	0.1	4
		CC17	Left radius	medio-anterior side	Appendicular skeleton	18.5	0.1	5
		CC18	Left ulnare	medial face	Appendicular skeleton	18.0	0.1	4
		CC19	Phalanx, II.1 (left forelimb)	medial face	Appendicular skeleton	18.1	0.1	4
		CC20	Right radius	medio-anterior side	Appendicular skeleton	18.0	0.2	5
		CC21	Right ulna	medio-anterior side	Appendicular skeleton	19.0	0.2	4
		CC22	Right scaphoid	medial face	Appendicular skeleton	18.2	0.2	5
		CC23	Right ulnare	medial face	Appendicular skeleton	18.1	0.1	5
		CC24	Phalanx, II.2 (right forelimb)	medial face	Appendicular skeleton	18.6	0.1	5
		CC25	1st left rib	distal	Axial	18.0	0.1	4
		CC26	1st right rib	distal	Axial	18.6	0.1	5
		CC27	7th left rib	mediane part	Axial	18.7	0.1	5
		CC28	13th left rib	medio-distal part	Axial	18.5	0.2	5
		CC29	Tooth	bulk, 23th of the left maxilla	Tooth	18.6	0.1	5
				Min. δ18Op		17.5
				Max. δ18Op		19.0
				Mean δ18Op		18.1	SD	0.4
				Δδ18Op		1.5
				Mid-range		18.2

## Sheet: Supp. Table 3
Table S3. Oxygen isotope compositions of osteichtyans phosphate are reported along with their corresponding sample location. Abbreviations = Ax.A: axial anterior, Ax.P: axial posterior.
Collection Number	Taxon	# Sample	Skeletal element	Sample location	Body region	δ18Op (‰, V-SMOW)
						Mean	SD	N
-	Thunnus thynnus	TT1	Right scapula		Ax. A	21.4	0.2	5
		TT2	Right coracoïd		Ax. A	21.7	0.3	4
		TT3	4th vertebra	centrum and lateral sides	Ax. A	21.0	0.1	5
		TT4	4th vertebra	neural spine, proximal part	Ax. A	22.2	0.3	4
		TT5	4th vertebra	neural spine, distal part	Ax. A	20.6	0.1	3
				Δ		1.6
		TT6	12th vertebra	centrum and lateral sides	Ax. A	20.4	0.3	4
		TT7	12th vertebra	neural spine, proximal part	Ax. A	20.6	0.3	5
		TT8	12th vertebra	neural spine, distal part	Ax. A	21.0	0.2	5
				Δ		0.6
		TT9	18th vertebra	centrum and lateral sides	Ax. A	20.7	0.3	5
		TT12	22th vertebra	centrum and lateral sides	Ax. P	21.3	0.3	5
		TT17	24th vertebra	centrum and lateral sides	Ax. P	21.7	0.1	5
		TT19	26th vertebra	centrum and lateral sides	Ax. P	21.7	0.1	5
		TT21	30th vertebra	centrum and lateral sides	Ax. P	21.5	0.1	4
		TT22	32th vertebra	centrum and lateral sides	Ax. P	21.8	0.2	3
		TT23	Uropyle	centrum and lateral sides	Ax. P	21.5	0.2	5
		TT25	3rd fin rays of the pelvic fin	distal part	Fin	21.6	0.1	5
		TT28	1st fin rays of the upper caudal fin	medial part	Fin	21.6	0.2	4
		TT30	4th fin rays of the upper caudal fin	proximal part	Fin	21.7	0.2	5
		TT33	4th fin rays of the lower caudal fin	distal part	Fin	21.7	0.1	5
		TT35	6th fin rays of the upper caudal fin	distal part	Fin	21.7	0.2	5
		TT37	6th fin rays of the lower caudal fin	distal part	Fin	21.3	0.1	5
		TT38	10th fin rays of the upper caudal fin	proximal part	Fin	21.8	0.3	5
		TT40	10th fin rays of the lower caudal fin	distal part	Fin	21.8	0.1	5
		TT41	1st fin rays of the first dorsal fin	proximal part	Fin	21.7	0.2	5
		TT42	3rd fin rays of the dorsal fin	medio-distal part	Fin	21.7	0.1	5
		TT44	1st fin rays of the right pectoral fin	distal part	Fin	21.7	0.2	5
		TT45	7 to 9th fin rays of the right pectoral fin	medio-distal part	Fin	21.3	0.2	4
		TT46	24 to 32th fin rays of the right pectoral fin	bulk	Fin	21.2	0.2	4
		TT48	7 and 8th fin rays of the anal fin	distal part	Fin	21.6	0.3	5
		TT50	4 to 7th fin rays of the second dorsal fin	distal part	Fin	21.1	0.2	3
		TT51	8th fin rays of the second dorsal fin	proximal part	Fin	21.5	0.2	5
		TT52	Branchial arch	medio-distal part	Branchial arch	22.5	0.2	5
		TT53	Branchial arch	medio-distal part	Branchial arch	22.2	0.2	5
		TT54	Branchial arch	medio-distal part	Branchial arch	21.7	0.2	5
		TT55	Branchial arch	medio-distal part	Branchial arch	20.9	0.2	5
		TT56	Branchial arch	medio-distal part	Branchial arch	20.4	0.3	3
		TT57	Branchial arch	medio-distal part	Branchial arch	21.0	0.5	4
		TT58	Parasphenoïd		Skull	20.8	0.3	5
		TT59	Teeth (n = 76), right dentary and premaxilla	bulk	Teeth	20.1	0.3	5
		TT60	Left sclerotic ring	bulk	Skull	20.0	0.2	5
		TT61	Right sclerotic ring	bulk	Skull	20.3	0.2	4
		TT62	1st vertebra	centrum and lateral sides	Ax. A	21.3	0.1	5
		TT63	Left scapula		Ax. A	20.4	0.2	4
		TT64	Left coracoid		Ax. A	20.8	0.2	5
		TT65	1st fin rays of the left pectoral fin	proximal part	Fin	20.2	0.2	3
		TT66	9-10th fin rays of the left pectoral fin	medial part	Fin	21.6	0.1	3
		TT67	Left premaxilla		Skull	20.7	0.3	4
		TT69	Left dentary		Skull	21.2	0.2	4
				Min. δ18Op		20.0
				Max. δ18Op		22.5
				Mean δ18Op		21.3	SD	0.6
				Δδ18Op		2.5
				Mid-range		21.2
Collection Number	Taxon	# Sample	Skeletal element	Sample location	Body region	δ18Op (‰, V-SMOW)
						Mean	SD	N
-	Xiphias gladius	XG1	Right scapula		Axial	22.1	0.1	4
		XG2	3rd vertebra	centrum, lateral sides	Axial	22.1	0.1	5
		XG3	1st fin rays of the dorsal fin	bulk	Fin	21.8	0.2	5
		XG4	4th fin rays of the dorsal fin	proximal part	Fin	21.8	0.1	5
		XG5	4th fin rays of the dorsal fin	medial part	Fin	22.2	0.2	5
				Δ		0.4
		XG9	3rd fin rays of the anal fin	medio-distal part	Fin	21.9	0.1	5
		XG10	21st vertebra	centrum, lateral sides	Axial	22.5	0.1	5
		XG11	Last vertebra	centrum, lateral sides	Axial	22.0	0.1	5
		XG12	1st fin rays of the lower caudal fin	bulk	Fin	21.7	0.1	5
		XG13	1st fin rays of the upper caudal fin	bulk	Fin	21.6	0.1	5
		XG15	4th fin rays of the lower caudal fin	proximal part	Fin	21.8	0.2
		XG16	6th fin rays of the lower caudal fin	proximal part	Fin	21.6	0.3	5
		XG17	6th fin rays of the lower caudal fin	distal part	Fin	21.7	0.2	5
				Δ		0.1
		XG18	6th fin rays of the upper caudal fin	proximal part	Fin	22.1	0.1	5
		XG19	6th fin rays of the upper caudal fin	distal part	Fin	21.9	0.1	5
				Δ		-0.2
		XG20	9th fin rays of the lower caudal fin	proximal part	Fin	22.1	0.1	5
		XG21	9th fin rays of the upper caudal fin	proximal part	Fin	22.1	0.1	5
		XG23	1st fin rays of the right pectoral fin	distal part	Fin	22.2	0.3	4
		XG25	3rd fin rays of the right pectoral fin	distal part	Fin	22.4	0.1	5
		XG27	6th fin rays of the right pectoral fin	distal part	Fin	22.4	0.2	5
		XG28	Rostrum	60 cm from the base	Rostrum	22.8	0.1	5
		XG29	Rostrum	45 cm from the base	Rostrum	22.4	0.4	4
		XG30	Rostrum	30 cm from the base	Rostrum	22.4	0.1	5
		XG31	Rostrum	15 cm from the base	Rostrum	22.0	0.2	4
		XG32	Rostrum	base, 0 cm	Rostrum	22.2	0.2	5
				Δ		0.8
		XG33	6th vertebra	centrum, lateral sides	Axial	22.2	0.2	5
		XG34	10th vertebra	centrum, lateral sides	Axial	22.0	0.2	4
		XG35	12th vertebra	centrum, lateral sides	Axial	22.8	0.2	4
		XG36	15th vertebra	centrum, lateral sides	Axial	22.5	0.2	4
		XG37	19th vertebra	centrum, lateral sides	Axial	21.9	0.3	5
		XG38	Neurocranium	frontal	Skull	21.1	0.2	5
		XG39	Left sclerotic ring	bulk	Skull	20.8	0.5	4
		XG40	Right sclerotic ring	bulk	Skull	20.0	0.2	4
				Min. δ18Op		20.0
				Max. δ18Op		22.8
				Mean δ18Op		22.0	SD	0.5
				Δδ18Op		2.8
				Mid-range		21.4

## Sheet: Supp. Table 4
Table S4. p-values from the Mann-Whitney statistical test. In the tables, skeleton is abbreviated as Skel., appendicular as App. and branchial archs as Bran. Statiscal test were performed when each skeletal part have at least 5 sampled skeletal elements.
North Atlantic D. delphis delphis (M.1162)								Mediterranean X. gladius
		Axial Skel. (n=35)	App. Skel. (n=7)	Skull (n=1)	Teeth (n=3)					Axial Skel. (n =20)	Fins (n = 8)	Rostrum (n=4)	Skull (n=3)
Axial Skel.		-	0.0024	-	-			Axial Skel.		-	0.0506	-	-
App. Skel.		-	-	-	-			Fins		-	-	-	-
Skull		-	-	-	-			Rostrum		-	-	-	-
Teeth		-	-	-	-			Skull		-	-	-	-
Mediterranean D. delphis delphis (MNHN-ZC-AC-1876-275)								Mediterranean T.thynnus
		Axial Skel. (n=25)	App. Skel. (n=7)	Teeth (n=1)						Axial Skel. Ant (n = 10)	Axial Skel. Post (n = 8)	Bran. (n=6)	Fins (n = 18)	Skull (n=5)	Teeth (n=1)
Axial Skel.		-	0.02	-				Axial Skel. Ant		-	0.0277	0.2608	0.0167	0.1876	-
App. Skel.		-	-	-				Axial Skel. Post		-	-	0.9361	0.7131	0.0081	-
Skull		-	-	-				Bran.		-	-	-	0.9733	0.0828	-
Teeth		-	-	-				Fins		-	-	-	-	0.004	-
								Skull		-	-	-	-	-	-
								Teeth		-	-	-	-	-	-
Kerguelen C. commersonii kerguelensis (MNHN-ZC-AC-1983-058)
		Axial Skel. (n=19)	App. Skel. (n=8)	Skull (n=1)	Teeth (n=1)
Axial Skel.		-	0.0393		-
App. Skel.		-	-	-	-
Skull		-	-	-	-
Teeth		-	-	-	-

## Sheet: Supp. Table 5
	Table S5. Marine surface water δ18Osw (‰, V-SMOW) values of water masses in which lived dolphins and osteichthyans specimens. Data were downloaded from GISS.
	Location		GPS coordonates			Years sampled		Depth (m)		δ18Osw
			Latitude (°N)	Longitude (°E)						Mean (n)		SD		Range
	Mediterranean Sea		30 to 45	-10 to 40		1949 - 1990		0 - 300		1.5 (608)		0.4		0.5 to 4
			30 to 45	-10 to 40		1949 - 1990		0 - 1000		1.5 (855)		0.2		0.5 to 2.4
	North Atlantic		-50 to 50	-45 to 10		1949 - 2008		0 - 300		0.6 (207)		0.4		-0.6 to 1.4
	Kerguelen Islands		-50 to -40	50 to 90		1969 - 2006		0 -300		-0.1 (200)		0.3		-0.6 to 0.8
